# Supplementary material for: Is a One Health Approach Utilized for Q Fever Control? A Comprehensive Literature Review
Source: PubMed Central journal article supplement (PMC6427780; doi:10.3390/ijerph16050730), 2019-02-28
Supplement: ijerph-16-00730-s001.pdf [file ijerph-16-00730-s001.pdf]

**Table 1.** Logic grids showing subject headings and keywords used for searching databases until 13 June 2018.

| <b>PUBMED (Logic Grid 1)</b>                                                                                                                                                                                                                         |                                                                                                                                                                                                                                                |
|------------------------------------------------------------------------------------------------------------------------------------------------------------------------------------------------------------------------------------------------------|------------------------------------------------------------------------------------------------------------------------------------------------------------------------------------------------------------------------------------------------|
| Q fever                                                                                                                                                                                                                                              | One Health                                                                                                                                                                                                                                     |
| "q fever"[mh] OR "q fever"[tw] OR q-fever[tiab] OR <i>Coxiella burnetii</i> *[tiab] OR acute q fever[tiab] OR chronic q fever[tiab] OR query fever[tiab]                                                                                             | "one health"[mh] OR one health concept[tiab] OR one health initiative[tiab] OR one medicine initiative[tiab] OR "one health"[tw] OR one health*[tiab] OR "one medicine"[tw] OR one medicine*[tiab] OR "one health"[all] OR "one medicine"[all] |
| <b>EMBASE (Logic Grid 2)</b>                                                                                                                                                                                                                         |                                                                                                                                                                                                                                                |
| Q fever                                                                                                                                                                                                                                              | One Health                                                                                                                                                                                                                                     |
| "q fever"/syn OR "q fever":ti,ab OR "acute q fever":ti,ab OR "chronic q fever":ti,ab                                                                                                                                                                 | "one health"/syn "one health concept"/de OR "one health initiative"/de OR "one medicine initiative"/de OR "one health":ti,ab OR "one medicine":ti,ab                                                                                           |
| <b>CINAHL (Logic Grid 3)</b>                                                                                                                                                                                                                         |                                                                                                                                                                                                                                                |
| Q fever                                                                                                                                                                                                                                              | One Health                                                                                                                                                                                                                                     |
| MH q fever OR TI "q fever" OR AB "q fever" OR TI " <i>Coxiella burnetii</i> " OR AB " <i>Coxiella burnetii</i> " OR TI "acute q fever" OR AB "acute q fever" OR TI "chronic q fever" OR AB "chronic q fever" OR TI "query fever" OR AB "query fever" | TI "one health" OR AB "one health" OR TI "one medicine" OR AB "one medicine" OR MW "one health*" OR MW "one medicine**"                                                                                                                        |
| <b>SCOPUS (Logic Grid 4)</b>                                                                                                                                                                                                                         |                                                                                                                                                                                                                                                |
| Q fever                                                                                                                                                                                                                                              | One Health                                                                                                                                                                                                                                     |
| "q fever" OR "q-fever" OR "acute q fever" OR "chronic q fever" OR " <i>C. burnetii</i> " OR " <i>Coxiella burnetii</i> " OR "query fever"                                                                                                            | "one health" OR "one medicine" OR "one health*" OR "one medicine**"                                                                                                                                                                            |
| <b>WEB OF SCIENCE (Logic Grid 5)</b>                                                                                                                                                                                                                 |                                                                                                                                                                                                                                                |
| Q fever                                                                                                                                                                                                                                              | One Health                                                                                                                                                                                                                                     |
| "q fever" OR "q-fever" OR "acute q fever" OR "chronic q fever" OR " <i>Coxiella burnetii</i> " OR "query fever"                                                                                                                                      | "one health" OR "one medicine" OR "one health*" OR "one medicine**"                                                                                                                                                                            |
| <b>PsycINFO (Logic Grid 6)</b>                                                                                                                                                                                                                       |                                                                                                                                                                                                                                                |
| Q fever                                                                                                                                                                                                                                              | One Health                                                                                                                                                                                                                                     |
| q fever.sh OR q fever.ti,ab OR q-fever.ti,ab OR acute q fever.ti,ab OR query fever.ti,ab OR q fever.tw OR q-fever.tw OR q fever.mp OR q-fever.mp OR <i>Coxiella burnetii</i> .ti,ab OR <i>Coxiella burnetii</i> .tw OR <i>Coxiella burnetii</i> .mp  | one health.sh OR one health.ti,ab OR one health.tw OR one health.mp OR one medicine.sh OR one medicine.ti,ab OR one medicine.tw OR one medicine.mp                                                                                             |
